# Supplementary material for: Migration Behavior of Lubricants in Polypropylene Composites under Accelerated Thermal Aging
Source: MDPI journal article supplement (doi:10.3390/polym13111723), 2021-05-24
Supplement: s1 [file s1]

# Migration Behavior of Lubricants in Polypropylene Composites under Accelerated Thermal Aging

Mun Gyu Bak <sup>1</sup>, Jong Sung Won <sup>2</sup>, Seon Woong Koo <sup>3</sup>, Arom Oh <sup>1</sup>, Han Ki Lee <sup>1</sup>, Dae-Sik Kim <sup>1</sup> and Seung Goo Lee <sup>3,\*</sup>

<sup>1</sup> Department of Plastic Materials Research Team, Automotive Research & Development, Hyundai Motor Group, Hwaseong-si 445-010, Korea; mg\_bak@hyundai.com (M.G.B.); arom@hyundai.com (A.O.); HK\_Lee@hyundai.com (H.K.L.); kimds@hyundai.com (D.-S.K.)

<sup>2</sup> Robert Frederick Smith School of Chemical and Biomolecular Engineering, Cornell University, Ithaca, NY 14853, USA; jw2636@cornell.edu

<sup>3</sup> Department of Advanced Organic Materials & Textile Engineering, Chungnam National University, Daejeon 34134, Korea; muzicle@torayamk.com

\* Correspondence: lsgoo@cnu.ac.kr

**Table S1.** XPS surface element analysis data of polypropylene/lubricants composites aged at different temperatures and 100% humidity.

| Mg    | Chemical Composition (%) |      |      | Atomic Ratio |       | Binding Energy (eV)           |
|-------|--------------------------|------|------|--------------|-------|-------------------------------|
|       | C                        | O    | Mg   | O/C          | Mg/C  |                               |
| 20 °C | 96.52                    | 3.48 | -    | 0.040        | -     | C-C (285)<br>C=O (287.6)      |
| 50 °C | 96.85                    | 3.15 | -    | 0.032        | -     | C-OH (286.1)                  |
| 70 °C | 97.31                    | 2.69 | -    | 0.027        | -     | C-O (532)                     |
| 90 °C | 98.65                    | 1.19 | 0.16 | 0.012        | 0.002 | O=C-O (534)<br>MgO (1304)     |
| Ca    | Chemical Composition (%) |      |      | Atomic Ratio |       | Binding Energy (eV)           |
|       | C                        | O    | Ca   | O/C          | Ca/C  |                               |
| 20 °C | 94.53                    | 5.47 | -    | 0.058        | -     | C-C (285)<br>C=O (287.6)      |
| 50 °C | 93.51                    | 5.30 | 1.19 | 0.056        | 0.013 | C-OH (286.1)                  |
| 70 °C | 92.6                     | 5.35 | 2.05 | 0.052        | 0.022 | C-O (532)                     |
| 90 °C | 95.41                    | 4.59 | -    | 0.048        | -     | O=C-O (534)<br>CaO (347, 351) |

**Table S2.** Roughness parameters of thermal aged polypropylene/lubricant composites by AFM on images of 20  $\mu\text{m}$   $\times$  20  $\mu\text{m}$ .

| <b>Composites</b>       | <b>Aging temperature<br/>(°C)</b> | <b>Root mean square<br/>roughness, RMS<br/>(nm)</b> | <b>Mean roughness,<br/>Ra (nm)</b> |
|-------------------------|-----------------------------------|-----------------------------------------------------|------------------------------------|
| <b>Polypropylene/Mg</b> | 20                                | 47.11                                               | 41.04                              |
|                         | 50                                | 77.01                                               | 59.50                              |
|                         | 70                                | 87.76                                               | 74.51                              |
|                         | 90                                | 195.56                                              | 165.62                             |
| <b>Polypropylene/Ca</b> | 20                                | 208.45                                              | 148.25                             |
|                         | 50                                | 397.34                                              | 314.55                             |
|                         | 70                                | 214.73                                              | 181.57                             |
|                         | 90                                | 179.36                                              | 148.01                             |
